# Supplementary material for: Trends in symbiont-induced host cellular differentiation
Source: Preprints.org preprint supplement (doi:10.20944/preprints202004.0172.v1), 2020-04-10
Supplement: Supplementary file 2 [file supplementary]

## Sheet: Wolbachia-survey
step #	gene expression step	summary of results	host gene expression influenced by Wolbachia	Wolbachia phenotype investigated	sample type	host species	strain	data type	date	reference	misc notes
1	epigenetic	chromatin modifications in CI	Y	CI	whole animals	Drosophila simulans	wRi	review	2003	Harris HL, Braig HR. 2003. Sperm chromatin remodelling and Wolbachia -induced cytoplasmic incompatibility in Drosophila. Biochem. Cell Biol. 81:229–240. doi: 10.1139/o03-053.
1	epigenetic	Wolbachia alters male methylation patterns titer-dependently (causing feminization)	Y	feminization	whole animals, gonads	Zyginidia pullula	?	methylation-sensitive random DNA amplification	2009	Negri I, Franchini A, et al. 2009. Unravelling the Wolbachia evolutionary role: the reprogramming of the host genomic imprinting. Proc. R. Soc. B. 276:2485–2491. doi: 10.1098/rspb.2009.0324.
1	epigenetic	sequence analysis of a phage-encoded DNA adenine methyltransferase in the Wolbachia genome	NA	NA	NA	multiple	multiple	genomes	2011	Saridaki A et al. 2011. Wolbachia Prophage DNA Adenine Methyltransferase Genes in Different Drosophila-Wolbachia Associations Otto, M, editor. PLoS ONE. 6:e19708. doi: 10.1371/journal.pone.0019708.
1	epigenetic	Wolbachia may influence host epigenetics through hormone signalling	Y	multiple	NA	multiple	multiple	review	2012	Negri I, Pellecchi M. 2012. Sex Steroids in Insects and the Role of the Endosymbiont Wolbachia:A New Perspective. In: Sex Hormones. Dubey, R, editor. InTech. doi: 10.5772/26892.
1	epigenetic	Wolbachia may influence host epigenetics through hormone signalling	Y	multiple	NA	multiple	multiple	review	2012	Negri I. 2012. Wolbachia as an “Infectious” Extrinsic Factor Manipulating Host Signaling Pathways. Frontiers in Endocrinology. 2. doi: 10.3389/fendo.2011.00115.
1	epigenetic	Wolbachia-induced changes in methylation that are largely random, except for some excess in membrane-associated proteins. Little response at the transcriptional level	N	NA	whole animals	Aedes aegypti	wMelPop-CLA	DNA methylation array, microarray	2013	Ye YH et al. 2013. Infection with a Virulent Strain of Wolbachia Disrupts Genome Wide-Patterns of Cytosine Methylation in the Mosquito Aedes aegypti Bourtzis, K, editor. PLoS ONE. 8:e66482. doi: 10.1371/journal.pone.0066482.
1	epigenetic	Wolbachia infection increases testis DNA methylation, however, overexpression of DMT reduces Wolbachia titer	NA	CI	whole animals, testis, ovaries	Drosophila melanogaster	wMel	MethylFlash, bisulfite sequencing	2014	LePage DP, Jernigan KK, Bordenstein SR. 2014. The relative importance of DNA methylation and Dnmt2 -mediated epigenetic regulation on Wolbachia densities and cytoplasmic incompatibility. PeerJ. 2:e678. doi: 10.7717/peerj.678.
1	epigenetic	Wolbachia deubiquitlating enzyme CidB and its binding protein CidA induce CI (failed replacement of protamines with histones in the embryo) and are rescued by infected females	Y	CI	whole animals	Culex pipiens, Drosophila melanogaster	wPip	functional transgenics	2017	Beckmann JF, Ronau JA, Hochstrasser M (2017) A Wolbachia deubiquitylating enzyme induces cytoplasmic incompatibility. Nature Microbiology 2:17007. https://doi.org/10.1038/nmicrobiol.2017.7
1	epigenetic	Host DNA/RNA methyltransferase is upregulated by Wolbachia and conferrs viral inhibition	Y	viral inhibition	whole animals, cells	Drosophila melanogaster	wMel	RT-qPCR	2017	Bhattacharya T, Newton ILG, Hardy RW. 2017. Wolbachia elevates host methyltransferase expression to block an RNA virus early during infection McGraw, EA, editor. PLoS Pathog. 13:e1006427. doi: 10.1371/journal.ppat.1006427.
1	epigenetic	Wolbachia genes CifA and CifB induce CI, and can be rescued by infected females	Y	CI	whole animals	Drosophila melanogaster	wMel	functional transgenics	2017	LePage DP, Metcalf JA, Bordenstein SR, et al (2017) Prophage WO genes recapitulate and enhance Wolbachia-induced cytoplasmic incompatibility. Nature 543:243–247. https://doi.org/10.1038/nature21391
1	epigenetic	Wolbachia protein CidB binds to karyopherin- a and the P32 protamine-histone exchange factor to induce CI. CidA prevents CidB binding to these elements.	Y	CI	testis	testis	wPip	transgenics, Co-IP, LC-MS/MS	2019	Beckmann JF, Sharma GD, Mendez L, et al (2019) The Wolbachia cytoplasmic incompatibility enzyme CidB targets nuclear import and protamine-histone exchange factors. eLife 8:e50026. https://doi.org/10.7554/eLife.50026
1.5	epigenetic, post-transcription	Wolbachia inhibits host miRNA expression, which inhibits DNA methyltransferase expression, which reduces genome methylation globally, and ultimately inhibits viral (dengue) replication	Y	viral inhibition	whole animals, cells	Aedes aegypti	wMelPop	RT-qPCR	2013	Zhang G, Hussain M, O’Neill SL, Asgari S. 2013. Wolbachia uses a host microRNA to regulate transcripts of a methyltransferase, contributing to dengue virus inhibition in Aedes aegypti. Proceedings of the National Academy of Sciences. 110:10276–10281. doi: 10.1073/pnas.1303603110.
1.5	epigenetic, post-transcription	Wolbachia inhibits expression of the masculinizing gene Masc in males (repressed in females by the Fem piRNA), which results in female-specific splicing and failed dosage compensation	Y	male killing	whole animals	Ostrinia scapulalis	?	RNAseq	2015	Fukui T et al. 2015. The Endosymbiotic Bacterium Wolbachia Selectively Kills Male Hosts by Targeting the Masculinizing Gene McGraw, EA, editor. PLoS Pathog. 11:e1005048. doi: 10.1371/journal.ppat.1005048.
2	transcription	Wolbachia do not induce host expression of antimicrobial peptides	N	NA	whole animals	Drosophila simulans	wRi, wAlbB	northern blot	2000	Bourtzis K, Pettigrew MM, O’Neill SL. 2000. Wolbachia neither induces nor suppresses transcripts encoding antimicrobial peptides. Insect molecular biology. 9:635–639.
2	transcription	expression of type IV secretion system	NA	NA	ovaries and testis	Armadillidium vulgare	wVul	southern blot	2008	Félix C et al. 2008. Characterization and transcriptional analysis of two gene clusters for type IV secretion machinery in Wolbachia of Armadillidium vulgare. Research in Microbiology. 159:481–485. doi: 10.1016/j.resmic.2008.05.007.
2	transcription	differential expression of host Angiotensin Converting Enzyme (Ance)	Y	NA	cells	Drosophila melanogaster	wMel	microarray	2008	Xi Z, Gavotte L, Xie Y, Dobson SL. 2008. Genome-wide analysis of the interaction between the endosymbiotic bacterium Wolbachia and its Drosophila host. BMC Genomics. 9:1. doi: 10.1186/1471-2164-9-1.
2	transcription	host transcriptional response to antibiotic curing of Wolbachia	Y	NA	whole animals	Brugia malayi	wBm	TEM, qPCR, microarray	2009	Ghedin E et al. 2009. Brugia malayi Gene Expression in Response to the Targeting of the Wolbachia Endosymbiont by Tetracycline Treatment Jones, MK, editor. PLoS Negl Trop Dis. 3:e525. doi: 10.1371/journal.pntd.0000525.
2	transcription	increased expression of host ferritin with infection	Y	NA	whole animals, cells	Asobara tabida, Drosophila simulans, Aedes aegypti	wAtab3, wRi, wMel	qPCR	2009	Kremer N et al. 2009. Wolbachia Interferes with Ferritin Expression and Iron Metabolism in Insects Schneider, DS, editor. PLoS Pathogens. 5:e1000630. doi: 10.1371/journal.ppat.1000630.
2	transcription	Wolbachia-induced upregulation of host immune gene expression	Y	NA	whole animals, cells	Anopheles gambiae	wMelPop	qPCR	2010	Kambris Z et al. 2010. Wolbachia Stimulates Immune Gene Expression and Inhibits Plasmodium Development in Anopheles gambiae Vernick, KD, editor. PLoS Pathogens. 6:e1001143. doi: 10.1371/journal.ppat.1001143.
2	transcription	host transcriptome, with a few Wolbachia transcripts detected	NA	NA	whole animals	Cimex lectularius	wCle	454 RNAseq	2011	Bai X, Mamidala P, Rajarapu SP, Jones SC, Mittapalli O. 2011. Transcriptomics of the Bed Bug (Cimex lectularius) Marion-Poll, F, editor. PLoS ONE. 6:e16336. doi: 10.1371/journal.pone.0016336.
2	transcription	Wolbachia-infection alters transcription of host immune, metabolic, and many other gene categories	Y	NA	cells	Anopheles gambiae	wAlbB, wRi	microarray, qPCR	2011	Hughes GL et al. 2011. Wolbachia Infections in Anopheles gambiae Cells: Transcriptomic Characterization of a Novel Host-Symbiont Interaction Bourtzis, K, editor. PLoS Pathogens. 7:e1001296. doi: 10.1371/journal.ppat.1001296.
2	transcription	Wolbachia induced the downregulation of 2 host genes and upregulation of none. In contrast, Cardinium evoked a much larger response.	N	NA	cells	Bombyx mori	wStr	microarray	2011	Nakamura Y et al. 2011. Differentially expressed genes in silkworm cell cultures in response to infection by Wolbachia and Cardinium endosymbionts: Silkworm cell response to Wolbachia and Cardinium. Insect Molecular Biology. 20:279–289. doi: 10.1111/j.1365-2583.2010.01056.x.
2	transcription	sex-specific expression of two Ank-domain-containing genes in wMel and wAu, but not wRi	Y	NA	male vs female gonads	Drosophila melanogaster, Drosophila simulans	wMel, wRi, wAu	qRT PCR	2011	Papafotiou G, Oehler S, Savakis C, Bourtzis K (2011) Regulation of Wolbachia ankyrin domain encoding genes in Drosophila gonads. Research in Microbiology 162:764–772. https://doi.org/10.1016/j.resmic.2011.06.012
2	transcription	Host histone chaperone Hira expression is downregulated in infected males relative to uninfected and females	Y	CI	whole animals	Drosophila melanogaster, Drosophila simulans	wMel, wRi	qPCR	2011	Zheng Y, Ren P-P, Wang J-L, Wang Y-F. 2011. Wolbachia-Induced Cytoplasmic Incompatibility Is Associated with Decreased Hira Expression in Male Drosophila Wutz, A, editor. PLoS ONE. 6:e19512. doi: 10.1371/journal.pone.0019512.
2	transcription	Wolbachia increases the expression of host immune genes and decreases the expression of spermatogenesis genes	Y	CI	testis	Drosophila melanogaster	wMel	microarray, qPCR, in situ hybridization	2011	Zheng Y, Wang J-L, et al. 2011. Differentially expressed profiles in the larval testes of Wolbachia infected and uninfected Drosophila. BMC Genomics. 12:595. doi: 10.1186/1471-2164-12-595.
2	transcription	host immune genes were upregulated in infected tissue, compared to uninfected tissues	Y	feminization	whole animals, ovaries, immune tissues	Armadillidium vulgare	wVul	EST Sanger seq, qPCR	2012	Chevalier F et al. 2012. Feminizing Wolbachia: a transcriptomics approach with insights on the immune response genes in Armadillidium vulgare. BMC Microbiol. 12:S1. doi: 10.1186/1471-2180-12-S1-S1.
2	transcription	only 26 Wolbachia genes DE: DNA replication, translation, and membrane transport; proteomic-transcriptomic correlation (detected proteins were highest expressed transcripts)	M	NA	soma vs female germline	Onchocerca volvulus	wOo	DNAseq, RNAseq, proteomics	2012	Darby AC et al. 2012. Analysis of gene expression from the Wolbachia genome of a filarial nematode supports both metabolic and defensive roles within the symbiosis. Genome Research. 22:2467–2477. doi: 10.1101/gr.138420.112.	wOo transcripts = 5% of reads
2	transcription	host immune, oogenesis, and embryogenesis gene expression was altered by infection	Y	oogenesis rescue	ovary	Asobara tabida	wAtab3	EST Sanger seq, qPCR	2012	Kremer N et al. 2012. Influence of Wolbachia on host gene expression in an obligatory symbiosis. BMC microbiology. 12:S7.
2	transcription	expression and regulation of the type IV secretion system, and co-regulation of riboflavin synthesis enzyme	NA	riboflavin synthesis	whole worms	Brugia malayi	wBm	qPCR, western blots, electrophoretic mobility shift assays	2012	Li Z, Carlow CKS. 2012. Characterization of Transcription Factors That Regulate the Type IV Secretion System and Riboflavin Biosynthesis in Wolbachia of Brugia malayi Knight, M, editor. PLoS ONE. 7:e51597. doi: 10.1371/journal.pone.0051597.
2	transcription	upregulation of host meiotic gene grauzone via Wolbachia transcriptional regulator wtrM	Y	CI	ovaries and testis	Culex molestus	wPip	RT-PCR, transgenics	2013	Pinto SB et al. 2013. Transcriptional Regulation of Culex pipiens Mosquitoes by Wolbachia Influences Cytoplasmic Incompatibility Vernick, KD, editor. PLoS Pathog. 9:e1003647. doi: 10.1371/journal.ppat.1003647.
2	transcription	Wolbachia induces increased expression of the juvenile hormone (JH) pathway and methoprene-tolerant (Met) in sperm. Overexpression of these genes alone can cause embryonic mortality, which is rescued by mating with an infected female	Y	CI	testis, ovaries	Drosophila melanogaster	wMel	RT-qPCR	2014	Liu C et al. 2014. Wolbachia-induced paternal defect in Drosophila is likely by interaction with the juvenile hormone pathway. Insect Biochemistry and Molecular Biology. 49:49–58. doi: 10.1016/j.ibmb.2014.03.014.
2	transcription	characterization of how Wolbachia's transcription elongation factor, GreA, binds to its RNA polymerase	NA	NA	in vitro	Brugia malayi	wBm	transgenetics, western blots	2014	Nag JK et al. 2014. Wolbachia Transcription Elongation Factor “Wol GreA” Interacts with α2ββ′σ Subunits of RNA Polymerase through Its Dimeric C-Terminal Domain Makepeace, BL, editor. PLoS Negl Trop Dis. 8:e2930. doi: 10.1371/journal.pntd.0002930.
2	transcription	Characterization of Wolbachia transcription across host life stages: most genes are stable, with only 7.5% differentially transcribed. Most differential transcription starts post-embryogenesis.	NA	NA	whole animals	Drosophila melanogaster	wMel	dual-RNAseq	2015	Gutzwiller F et al. 2015. Dynamics of Wolbachia pipientis Gene Expression Across the Drosophila melanogaster Life Cycle. G3&amp;#58; Genes|Genomes|Genetics. 5:2843–2856. doi: 10.1534/g3.115.021931.
2	transcription	Wolbachia directly blocks arborvirus replication without a transcriptional response itself, nor a miRNA response from the host (Wolbachia infection itself doesn't induce a miRNA response in JW18 cells)	NA	viral inhibition	cells	Drosophila melanogaster	wMel	RNAseq	2016	Rainey SM et al. 2016. Wolbachia Blocks Viral Genome Replication Early in Infection without a Transcriptional Response by the Endosymbiont or Host Small RNA Pathways McGraw, EA, editor. PLoS Pathog. 12:e1005536. doi: 10.1371/journal.ppat.1005536.
2	transcription	Transcriptional profile of worms and Wolbachia across developmental stages and sexes	M	NA	whole animals	Brugia malayi	wBm	dual RNAseq	2017	Grote A, Voronin D, Ding T, et al (2017) Defining Brugia malayi and Wolbachia symbiosis by stage-specific dual RNA-seq. PLOS Neglected Tropical Diseases 11:e0005357. https://doi.org/10.1371/journal.pntd.0005357
2	transcription	Wolbachia induces expression of host transcription factor GATA4, which suppresses the ovary-specific genes blastoderm-specific protein 25D (Bsg25D) and imaginal disc growth factor (Disc)	Y	NA	ovary, fat body, cells	Aedes aegypti	wMelPop	transgenics, RNAi, RT-qPCR	2018	Osei-Amo S, Hussein M, Asad S, Hugo L, Asgari S. 2018. Wolbachia -induced transcription factor GATA4 suppresses ovary-specific genes blastoderm-specific protein 25D and imaginal disc growth factor: GATA4 regulation of ovary-specific genes. Insect Mol Biol. 27:295–304. doi: 10.1111/imb.12371.
2	transcription	Host transcriptional profiles are altered by Wolbachia infection	Y	speciation	heads, abdomens	Drosophila paulistorum	?	RNAseq	2019	Baião GC, Schneider DI, Miller WJ, Klasson L. 2019. The effect of Wolbachia on gene expression in Drosophila paulistorum and its implications for symbiont-induced host speciation. BMC Genomics. 20:465. doi: 10.1186/s12864-019-5816-9.
2	transcription	Wolbachia does not alter host mRNA expression in early embryogenesis	N	CI	whole animals	Drosophila melanogaster	wMel	RNAseq	2019	Mateos M, Silva NO, Ramirez P, et al (2019) Effect of heritable symbionts on maternally-derived embryo transcripts. Sci Rep 9:8847. https://doi.org/10.1038/s41598-019-45371-0
2.25	transcription, post-transcription	Wolbachia alters host gene and miRNA expression	Y	CI	ovary, testis	Drosophila melanogaster	wMel	RNAseq, RT-qPCR	2019	He Z, Zheng Y, Yu W-J, et al (2019) How do Wolbachia modify the Drosophila ovary? New evidences support the “titration-restitution” model for the mechanisms of Wolbachia-induced CI. BMC Genomics 20:608. https://doi.org/10.1186/s12864-019-5977-6
2.5	transcription, translation	Wolbachia alter expression of host translation, nucleotide synthesis, metabolism, and membrane proteins upon doxycycline treatment	Y	NA	cells	Aedes albopictus	wMelPop-CLA	RNAseq, LC-MS/MS	2014	Darby AC et al. 2014. Integrated transcriptomic and proteomic analysis of the global response of Wolbachia to doxycycline-induced stress. ISME J. 8:925–937. doi: 10.1038/ismej.2013.192.
2.5	transcription, translation	Characterization of the tissue-specific transcriptome and proteome of host and Wolbachia	NA	NA	dissected tissues	Dirofilaria immitis	wDi	RNAseq, LC-MS/MS	2015	Luck AN et al. 2015. Tissue-specific transcriptomics and proteomics of a filarial nematode and its Wolbachia endosymbiont. BMC Genomics. 16:920. doi: 10.1186/s12864-015-2083-2.
2.5	transcription, translation	Characterization of the developmental-stage-specific transcripome and proteome of the host and Wolbachia (although, A-tailing was used)	NA	NA	whole animals	Onchocerca volvulus	wOv	RNAseq, LC-MS/MS	2016	Bennuru S et al. 2016. Stage-Specific Transcriptome and Proteome Analyses of the Filarial Parasite Onchocerca volvulus and Its Wolbachia Endosymbiont. mBio. 7:e02028-16, /mbio/7/6/e02028-16.atom. doi: 10.1128/mBio.02028-16.
3	post-transcription	increased expression of host nonmuscle myosin II gene zipper mRNA	Y	CI	testis	Drosophila simulans	wRi	cDNA subtraction	2006	Clark ME, Heath BD, Anderson CL, Karr TL. 2006. Induced Paternal Effects Mimic Cytoplasmic Incompatibility in Drosophila. Genetics. 173:727–734. doi: 10.1534/genetics.105.052431.
3	post-transcription	Wolbachia induces male and female isoform expression in sexual mosaic moths (splicing)	Y	feminization	whole animals	Ostrinia scapulalis	?	RT-PCR	2010	Sugimoto TN, Fujii T, Kayukawa T, Sakamoto H, Ishikawa Y. 2010. Expression of a doublesex homologue is altered in sexual mosaics of Ostrinia scapulalis moths infected with Wolbachia. Insect Biochemistry and Molecular Biology. 40:847–854. doi: 10.1016/j.ibmb.2010.08.004.
3	post-transcription	Wolbachia alters host miRNA expression and through it induces the expression of a metalloprotease that confers efficient infection	Y	NA	whole animals, cells	Aedes aegypti	wMelPop-CLA	microarray, southern blot	2011	Hussain M, Frentiu FD, Moreira LA, O’Neill SL, Asgari S. 2011. Wolbachia uses host microRNAs to manipulate host gene expression and facilitate colonization of the dengue vector Aedes aegypti. Proceedings of the National Academy of Sciences. 108:9250–9255. doi: 10.1073/pnas.1105469108.
3	post-transcription	Wolbachia interaction with insect splicing-based sex determination systems	NA	feminization	NA	Ostrinia scapulalis	?	review	2012	Beukeboom LW. 2012. Microbial manipulation of host sex determination: Endosymbiotic bacteria can directly manipulate their host’s sex determination towards the production of female offspring. Bioessays. 34:484–488. doi: 10.1002/bies.201100192.
3	post-transcription	Wolbachia blocks host AGO1 from localizing to the nucleus by altering miRNA expression, which down regulates importin β-4, required for AGO1 transport	Y	NA	whole animals, cells	Aedes aegypti, Drosophila melanogaster	wMelPop-CLA	northern blot, western blot, RT-qPCR	2013	Hussain M, O’Neill SL, Asgari S. 2013. Wolbachia interferes with the intracellular distribution of Argonaute 1 in the dengue vector Aedes aegypti by manipulating the host microRNAs. RNA Biology. 10:1868–1875. doi: 10.4161/rna.27392.
3	post-transcription	Wolbachia increases the abundance of miRNA and piRNA in the nucleus and cytoplasm, causing an increase in the expression of AGO1-3	Y	NA	cells	Aedes aegypti	wMelPop-CLA	RNAseq, RT-qPCR, northern blots	2014	Mayoral JG, Etebari K, Hussain M, Khromykh AA, Asgari S. 2014. Wolbachia Infection Modifies the Profile, Shuttling and Structure of MicroRNAs in a Mosquito Cell Line Doucet, D, editor. PLoS ONE. 9:e96107. doi: 10.1371/journal.pone.0096107.
3	post-transcription	Wolbachia sRNAs WsnRNA-46 and WsnRNA-49 are expressed and conserved among strains/host infections. WsnRNA-46 upregulates Dynein expression	NA	NA	whole animals, cells	Aedes aegypti, Drosophila melanogaster, Drosophila simulans	wMelPop-CLA, wMelPop, wAu	dual-RNAseq, RT-qPCR, northern blots	2014	Mayoral JG, Hussain M, et al. 2014. Wolbachia small noncoding RNAs and their role in cross-kingdom communications. Proc Natl Acad Sci USA. 111:18721–18726. doi: 10.1073/pnas.1420131112.
3	post-transcription	Wolbachia induces the expression of host miRNA aae-miR-2940, which upregulates the expression of protein arginine methyltransferase AaArgM3	Y	viral inhibition	whole animals, cells	Aedes aegypti	wMelPop	RT-qPCR	2014	Zhang G, Hussain M, Asgari S. 2014. Regulation of arginine methyltransferase 3 by a Wolbachia-induced microRNA in Aedes aegypti and its effect on Wolbachia and dengue virus replication. Insect Biochemistry and Molecular Biology. 53:81–88. doi: 10.1016/j.ibmb.2014.08.003.
3	post-transcription	Identification of Wolbachia sRNAs and characterization of their conservation and one's expression	NA	NA	heads, cells	Aedes aegypti, Drosophila melanogaster	wMel, wMelPop, wMelCS, wAu	RNAseq	2015	Woolfit M, Algama M, Keith JM, et al (2015) Discovery of Putative Small Non-Coding RNAs from the Obligate Intracellular Bacterium Wolbachia pipientis. PLoS ONE 10:e0118595. https://doi.org/10.1371/journal.pone.0118595
3	post-transcription	Wolbachia infection alters host lncRNA expression	Y	NA	various (SRA)	Aedes aegypti	wMelPop-CLA	RNAseq	2016	Etebari K, Asad S, Zhang G, Asgari S. 2016. Identification of Aedes aegypti Long Intergenic Non-coding RNAs and Their Association with Wolbachia and Dengue Virus Infection Olson, KE, editor. PLoS Negl Trop Dis. 10:e0005069. doi: 10.1371/journal.pntd.0005069.
3	post-transcription	Wolbachia protein TomO is able to partially rescue loss of host sxl by binding to nos mRNA, increasing the amount of Nos	Y	germ cell rescue	ovaries	Drosophila melanogaster	wMel	transgenics, imaging, RNA immunocoprecipitation	2016	Ote M, Ueyama M, Yamamoto D (2016) Wolbachia protein TomO targets nanos mRNA and restores germ stem cells in Drosophila sex-lethal mutants. Current Biology 26:2223–2232. https://doi.org/10.1016/j.cub.2016.06.054
3	post-transcription	The wPip version of TomO also binds to nos to upregulate Nos. Differences in the proteins modulate localization, activity, etc.	Y	germ cell rescue	ovary	Drosophila melanogaster	wPip	transgenics, imaging, RNA immunocoprecipitation	2018	Ote M, Yamamoto D (2018a) Enhancing Nanos expression via the bacterial TomO protein is a conserved strategy used by the symbiont Wolbachia to fuel germ stem cell maintenance in infected Drosophila females. Archives of Insect Biochemistry and Physiology e21471. https://doi.org/10.1002/arch.21471
3	post-transcription	wMel in D. simulans induces mislocalized Orb translation because the Wolbachia protein TomO binds orb mRNA, preventing its translational repression by Cup	Y	NA	ovary	Drosophila simulans	wMel	transgenics, imaging, RNA immunocoprecipitation	2018	Ote M, Yamamoto D (2018b) The Wolbachia protein TomO interacts with a host RNA to induce polarization defects in Drosophila oocytes. Archives of Insect Biochemistry and Physiology 99:e21475. https://doi.org/10.1002/arch.21475
3	post-transcription	Wolbachia alters host miRNA expression	Y	CI	whole animals	Laodelphax striatellus	wStri	RNAseq, RT-qPCR	2019	Liu L, Zhang K-J, Rong X, Li Y-Y, Liu H. 2019. Identification of Wolbachia-Responsive miRNAs in the Small Brown Planthopper, Laodelphax striatellus. Front. Physiol. 10:928. doi: 10.3389/fphys.2019.00928.
4	translation	host ROS and antimicrobial peptide production	Y	NA	cells	Aedes albopictus	wAlbB	LC-MS/MS	2008	Brennan LJ, Keddie BA, Braig HR, Harris HL. 2008. The Endosymbiont Wolbachia pipientis Induces the Expression of Host Antioxidant Proteins in an Aedes albopictus Cell Line Alspaugh, A, editor. PLoS ONE. 3:e2083. doi: 10.1371/journal.pone.0002083.
4	translation	identification of secreted proteins from worms and Wolbachia	NA	NA	na - secreted proteins	Brugia malayi	wBm	LC-MS/MS	2009	Bennuru S et al. 2009. Brugia malayi Excreted/Secreted Proteins at the Host/Parasite Interface: Stage- and Gender-Specific Proteomic Profiling Ghedin, E, editor. PLoS Negl Trop Dis. 3:e410. doi: 10.1371/journal.pntd.0000410.
4	translation	stage and gender-specific proteome of worm and bacterium	NA	NA	whole animals	Brugia malayi	wBm	LC-MS/MS	2011	Bennuru S et al. 2011. Stage-specific proteomic expression patterns of the human filarial parasite Brugia malayi and its endosymbiont Wolbachia. Proceedings of the National Academy of Sciences. 108:9649–9654. doi: 10.1073/pnas.1011481108.
4	translation	proteomic profile of infected (host + Wolbachia) and uninfected cells	Y	NA	cells	Aedes albopictus	wStr	LC-MS/MS	2014	Baldridge GD et al. 2014. Proteomic profiling of a robust W olbachia infection in an A edes albopictus mosquito cell line: Proteomic analysis of Wolbachia in mosquito cells. Molecular Microbiology. 94:537–556. doi: 10.1111/mmi.12768.
4	translation	Wolbachia alters the abundance of host seminal fluid proteins	Y	CI	spermathecae, seminal receptacles	Drosophila melanogaster	wMel	2D-LC-MS/MS	2015	Yuan L-L et al. 2015. Quantitative Proteomic Analyses of Molecular Mechanisms Associated with Cytoplasmic Incompatibility in Drosophila melanogaster Induced by Wolbachia. Journal of Proteome Research. 14:3835–3847. doi: 10.1021/acs.jproteome.5b00191.
4	translation	Characterization of ovary proteome upon Wolbachia infection. Differential host protein content among infected, uninfected, and cross-infections suggests that Wolbachia can influence host gene expression, at least indirectly	Y	NA	ovaries	Drosophila melanogaster, Drosophila simulans	wMel, wMelCS, wRi	LC-MS/MS	2016	Christensen S et al. 2016. Wolbachia Endosymbionts Modify Drosophila Ovary Protein Levels in a Context-Dependent Manner. Applied and Environmental Microbiology. 82:5354–5363. doi: 10.1128/AEM.01255-16.
4	translation	Quantitative proteomic characterization of Wolbachia-induced changes in host protein expression. Overall: altered autophagy, metabolic signaling and protein degradation pathways, coupled with elevated vATPase, amino acid metabolism and TCA cycle proteins	Y	NA	cells	Aedes albopictus	wStr1	2D-LC-MS/MS	2017	Baldridge G et al. 2017. Proteomic analysis of a mosquito host cell response to persistent Wolbachia infection. Research in Microbiology. 168:609–625. doi: 10.1016/j.resmic.2017.04.005.
4	translation	Wolbachia induces many changes in the host proteome relative to uninfected cells and cells co-infected with a virus	Y	viral inhibition	cells	Aedes albopictus	wAlbB	LC-MS/MS	2017	Saucereau Y et al. 2017. Comprehensive proteome profiling in Aedes albopictus to decipher Wolbachia-arbovirus interference phenomenon. BMC Genomics. 18:635. doi: 10.1186/s12864-017-3985-y.
4	translation	Wolbachia titer is increased by the knockdown of host translation initiation and ribosomal proteins	M	NA	cells	Drosophila melanogaster	wMel	RNAi screen, imaging	2018	Grobler Y et al. 2018. Whole genome screen reveals a novel relationship between Wolbachia levels and Drosophila host translation McGraw, EA, editor. PLoS Pathog. 14:e1007445. doi: 10.1371/journal.ppat.1007445.
5	post-translation	increased expression of host proteasome and increased ubiquitination	Y	NA	cells	Aedes albopictus	wAlbB	LC-MS/MS and western blot	2009	Fallon AM, Witthuhn BA. 2009. Proteasome activity in a naïve mosquito cell line infected with Wolbachia pipientis wAlbB. In Vitro Cell.Dev.Biol.-Animal. 45:460–466. doi: 10.1007/s11626-009-9193-6.
5	post-translation	requirement of host ERAD pathway for normal titer; infection increses ubiquitination	M	NA	cell culture, ovary	Drosophila melanogaster	wMel	RNAi screen, imaging	2017	White PM et al. 2017. Reliance of Wolbachia on high rates of host proteolysis revealed by a genome-wide RNAi screen of Drosophila cells. Genetics. genetics.116.198903. doi: 10.1534/genetics.116.198903.
5	post-translation	Wolbachia induces massive ER reorganization in infected cells, which does not confer an increase in ER stress	NA	NA	cells	Drosophila melanogaster	wMel	RT-qPCR, imaging	2019	Fattouh N, Cazevieille C, Landmann, Frédéric. 2019. Wolbachia endosymbionts subvert the endoplasmic reticulum to acquire host membranes without triggering ER stress. PLOS Neglected Tropical Diseases. 13:25.
